# Supplementary material for: Functional Traits Drive Dispersal Interactions Between European Waterfowl and Seeds
Source: Frontiers journal article supplement (doi:10.3389/fpls.2021.795288), 2022-01-31
Supplement: Data_Sheet_7.pdf [file Data_Sheet_7.pdf]

Results of the model selection procedure. Zero-truncated GAMs were fitted on the number of waterfowl species that consumed each seed species (hereafter number of vector species) against the predictor variables of soil moisture, nutrient, salinity, temperature and light exposure EIVs, and seed roundness, mass and density.

| Model                                                                                       | $\Delta AIC$ |
|---------------------------------------------------------------------------------------------|--------------|
| EIV T + EIV F + s(EIV N) + s(EIV S) + s(Seed mass) + s(Seed density) + s(Roundness)         | 0            |
| EIV T + EIV F + s(EIV N) + s(EIV S) + s(Seed mass) + s(Seed density)                        | 0.22         |
| EIV T + EIV L + EIV F + s(EIV N) + s(EIV S) + s(Seed mass) + s(Seed density) + s(Roundness) | 1.52         |
| EIV T + EIV L + EIV F + s(EIV N) + s(EIV S) + s(Seed mass) + s(Seed density)                | 1.74         |
| EIV F + s(EIV N) + s(EIV S) + s(Seed mass) + s(Seed density) + s(Roundness)                 | 2.05         |
| EIV T + EIV F + s(EIV N) + s(EIV S) + s(Seed mass) + s(Seed density)                        | 2.47         |
| EIV L + EIV F + s(EIV N) + s(EIV S) + s(Seed mass) + s(Seed density) + s(Roundness)         | 3.08         |
| EIV T + EIV F + s(EIV N) + s(EIV S) + s(Seed mass) + s(Seed density)                        | 3.43         |
| EIV F + s(EIV S) + s(Seed mass) + s(Seed density) + s(Roundness)                            | 4.48         |
| EIV T + EIV F + s(EIV S) + s(Seed mass) + s(Seed density) + s(Roundness)                    | 4.62         |
| EIV T + EIV F + s(EIV S) + s(Seed mass) + s(Seed density)                                   | 4.83         |
| <b>EIV F + s(EIV S) + s(Seed mass) + s(Seed density)</b>                                    | <b>4.92</b>  |
| EIV L + EIV F + s(EIV S) + s(Seed mass) + s(Seed density) + s(Roundness)                    | 5.22         |
| EIV L + EIV F + s(EIV N) + s(EIV S) + s(Seed mass) + s(Seed density)                        | 5.48         |
| EIV T + EIV L + EIV F + s(EIV S) + s(Seed mass) + s(Seed density) + s(Roundness)            | 5.62         |
| EIV T + EIV L + EIV F + s(EIV S) + s(Seed mass) + s(Seed density)                           | 5.7          |
| Null model                                                                                  | 34.6         |

Table 1. Fitted models with  $\Delta AIC < 6$  and null model  $\Delta AIC$ . The selected final model is highlighted in bold.

|                 | Coefficient | Standard error | Chi squared | P (Chi) |
|-----------------|-------------|----------------|-------------|---------|
| Intercept 1     | -0.9568     | 0.2694         |             |         |
| Intercept 2     | -0.0125     | 0.2881         |             |         |
| EIV F           | 0.1666      | 0.0273         |             |         |
| s(EIV S)        | 0.1047      | 0.0317         | 23.4        | <0.0001 |
| s(Seed mass)    | 0.1045      | 0.0471         | 13.58       | 0.003   |
| s(Seed density) | 0.0607      | 0.0884         | 22.11       | <0.0001 |

Table 2. Coefficients and standard errors of the seed/plant traits used as predictors of the number of waterfowl species consuming each seed in the final model and results of the chi-squared tests for linearity of each predictor.
