# Supplementary material for: Functional Traits Drive Dispersal Interactions Between European Waterfowl and Seeds
Source: Front Plant Sci. 2022 Jan 31;12:795288. doi: 10.3389/fpls.2021.795288 (PMC8843038; doi:10.3389/fpls.2021.795288)
Supplement: Supplementary file 2 [file Data_Sheet_2.xlsx]

## Sheet: Sup.Mat_2_OK
Species	Feeding group	Number of sampled locations	Number of sampled birds	Agrostis canina	Agrostis capillaris	Agrostis stolonifera	Agrostis vinealis	Aira praecox	Ajuga reptans	Alisma plantago-aquatica	Allium schoenoprasum	Allium scorodoprasum	Allium vineale	Alnus glutinosa	Alnus incana	Alopecurus geniculatus	Alopecurus myosuroides	Alopecurus pratensis	Althaea officinalis	Amaranthus albus	Amaranthus deflexus	Amaranthus hybridus	Amaranthus retroflexus	Angelica archangelica	Anthoxanthum odoratum	Anthriscus sylvestris	Apera spica-venti	Arabidopsis thaliana	Arabis hirsuta	Arabis scabra	Arenaria serpyllifolia	Armeria maritima	Arrhenatherum elatius	Artemisia absinthium	Arthrocnemum macrostachyum	Atriplex hortensis	Atriplex littoralis	Atriplex patula	Atriplex portulacoides	Atriplex prostrata	Avena fatua	Avena sativa	Avenella flexuosa	Avenula pubescens	Baldellia ranunculoides	Bassia hirsuta	Beta vulgaris	Betula pendula	Betula pubescens
Anas acuta	Omnivore dabbling ducks	13	533	0	0	0	0	0	0	2	0	0	0	1	0	0	0	0	0	0	0	0	1	0	0	0	2	0	0	0	0	0	0	0	2	0	1	1	0	0	0	0	0	0	0	0	0	0	0
Spatula clypeata	Omnivore dabbling ducks	10	474	0	0	0	0	0	0	0	0	0	0	0	0	0	0	0	0	0	0	0	0	0	0	0	0	0	0	0	0	0	0	0	3	0	0	0	0	0	0	0	0	0	0	0	0	0	0
Anas crecca	Omnivore dabbling ducks	21	3054	0	0	2	0	0	0	9	0	0	0	4	1	1	1	1	0	0	1	0	0	0	0	0	2	0	0	0	0	1	0	0	5	0	1	3	3	3	0	0	0	0	1	2	0	4	0
Mareca penelope	Omnivore dabbling ducks	13	683	0	0	0	0	0	0	0	0	0	0	2	0	0	0	0	0	0	0	0	0	0	0	0	2	0	0	0	0	0	0	0	1	0	1	2	0	1	1	0	0	0	0	1	0	0	0
Anas platyrhynchos	Omnivore dabbling ducks	31	3430	0	0	0	0	0	1	7	0	0	0	10	0	0	0	0	1	1	0	1	1	0	1	1	0	0	0	0	0	0	0	0	0	1	1	2	1	2	1	5	0	0	0	1	2	5	3
Spatula querquedula	Omnivore dabbling ducks	3	213	0	0	0	0	0	0	3	0	0	0	0	0	0	0	0	0	0	0	0	0	0	0	0	0	0	0	0	0	0	0	0	1	0	0	0	0	0	0	0	0	0	0	0	0	0	0
Mareca strepera	Omnivore dabbling ducks	8	503	0	0	0	0	0	0	0	0	0	0	0	0	0	0	0	0	0	0	0	0	0	0	0	0	0	0	0	0	0	0	0	1	0	0	0	0	0	0	0	0	0	0	1	0	0	0
Anser albifrons	Terrestrial plant eaters	1	260	0	0	0	0	0	0	0	0	0	0	0	0	0	0	0	0	0	0	0	0	0	0	0	0	0	0	0	0	0	0	0	0	0	0	0	0	0	0	0	0	0	0	0	0	0	0
Anser anser	Terrestrial plant eaters	5	595	1	1	2	1	1	0	0	2	1	1	0	0	1	0	1	0	0	0	0	1	1	1	1	0	1	1	1	1	1	1	1	0	0	0	0	0	0	0	0	1	1	0	0	0	2	0
Anser brachyrhynchus	Terrestrial plant eaters			0	0	0	0	0	0	0	0	0	0	0	0	0	0	0	0	0	0	0	0	0	0	0	0	0	0	0	0	0	0	0	0	0	0	0	0	0	0	0	0	0	0	0	0	0	0
Anser erythropus	Terrestrial plant eaters	3	923	0	0	0	0	0	0	0	0	0	0	0	0	0	0	0	0	0	0	0	0	0	0	0	0	0	0	0	0	0	0	0	0	0	0	0	0	0	0	0	0	0	0	0	0	0	0
Anser fabalis	Terrestrial plant eaters	1	175	0	0	0	0	0	0	0	0	0	0	0	0	0	0	0	0	0	0	0	1	0	0	0	0	0	0	0	0	0	0	0	0	0	0	0	0	0	0	0	0	0	0	0	0	0	0
Aythya ferina	Omnivore diving ducks	7	202	0	0	0	0	0	0	0	0	0	0	0	0	0	0	0	0	0	0	0	0	0	0	0	0	0	0	0	0	0	0	0	0	0	0	0	0	0	0	0	0	0	0	0	0	0	0
Aythya fuligula	Omnivore diving ducks	7	431	0	0	0	0	0	0	0	0	0	0	1	0	0	0	0	0	0	0	0	0	0	0	0	0	0	0	0	0	0	0	0	0	0	0	0	0	0	0	0	0	0	0	0	0	0	1
Aythya marila	Omnivore diving ducks	2	463	0	0	0	0	0	0	0	0	0	0	0	0	0	0	0	0	0	0	0	0	0	0	0	0	0	0	0	0	0	0	0	0	0	0	0	0	0	0	0	0	0	0	0	0	0	0
Aythya nyroca	Omnivore diving ducks	2	2	0	0	0	0	0	0	0	0	0	0	0	0	0	0	0	0	0	0	0	0	0	0	0	0	0	0	0	0	0	0	0	0	0	0	0	0	0	0	0	0	0	0	0	0	0	0
Branta canadensis	Terrestrial plant eaters	1	50	0	0	0	0	0	0	0	0	0	0	0	0	0	0	0	0	0	0	0	0	0	0	0	0	0	0	0	0	0	0	0	0	0	0	0	0	0	0	0	0	0	0	0	0	0	0
Branta leucopsis	Terrestrial plant eaters	2	45	0	0	0	0	0	0	0	0	0	0	0	0	0	0	0	0	0	0	0	0	0	0	0	0	0	0	0	0	0	0	0	0	0	0	0	0	0	0	0	0	0	0	0	0	0	0
Bucephala clangula	Omnivore diving ducks	6	201	0	0	0	0	0	0	0	0	0	0	0	0	0	0	0	0	0	0	0	0	0	0	0	0	0	0	0	0	0	0	0	0	0	0	0	0	0	0	0	0	0	0	0	0	0	0
Bucephala islandica	Omnivore diving ducks	1	48	0	0	0	0	0	0	0	0	0	0	0	0	0	0	0	0	0	0	0	0	0	0	0	0	0	0	0	0	0	0	0	0	0	0	0	0	0	0	0	0	0	0	0	0	0	0
Clangula hyemalis	Marine invertebrate eating diving ducks	2	528	0	0	0	0	0	0	0	0	0	0	0	0	0	0	0	0	0	0	0	0	0	0	0	0	0	0	0	0	0	0	0	0	0	0	0	0	0	0	0	0	0	0	0	0	0	0
Cygnus columbianus	Aquatic plant eaters	2	60	0	0	0	0	0	0	0	0	0	0	0	0	0	0	0	0	0	0	0	0	0	0	0	0	0	0	0	0	0	0	0	0	0	0	0	0	0	0	0	0	0	0	0	0	0	0
Cygnus cygnus	Aquatic plant eaters	1	77	0	0	0	0	0	0	0	0	0	0	0	0	0	0	1	0	0	0	0	0	0	0	0	0	0	0	0	0	0	0	0	0	0	0	0	0	0	0	0	0	0	0	0	0	0	0
Cygnus olor	Aquatic plant eaters	1	8	0	0	0	0	0	0	0	0	0	0	0	0	0	0	0	0	0	0	0	0	0	0	0	0	0	0	0	0	0	0	0	0	0	0	0	0	0	0	0	0	0	0	0	0	0	0
Marmaronetta angustirostris	Omnivore dabbling ducks	3	157	0	0	0	0	0	0	0	0	0	0	0	0	0	0	0	0	0	0	0	0	0	0	0	0	0	0	0	0	0	0	0	0	0	0	0	0	0	0	0	0	0	0	0	0	0	0
Melanitta nigra	Marine invertebrate eating diving ducks	1	250	0	0	0	0	0	0	0	0	0	0	0	0	0	0	0	0	0	0	0	0	0	0	0	0	0	0	0	0	0	0	0	0	0	0	0	0	0	0	0	0	0	0	0	0	0	0
Mergus serrator	Fish eating diving duck	1	143	0	0	0	0	0	0	0	0	0	0	0	0	0	0	0	0	0	0	0	0	0	0	0	0	0	0	0	0	0	0	0	0	0	0	0	0	0	0	0	0	0	0	0	0	0	0
Netta rufina	Omnivore diving ducks	2	9	0	0	0	0	0	0	0	0	0	0	0	0	0	0	0	0	0	0	0	0	0	0	0	0	0	0	0	0	0	0	0	0	0	0	0	0	0	0	0	0	0	0	0	0	0	0
Somateria mollissima	Marine invertebrate eating diving ducks	1	50	0	0	0	0	0	0	0	0	0	0	0	0	0	0	0	0	0	0	0	0	0	0	0	0	0	0	0	0	0	0	0	0	0	0	0	0	0	0	0	0	0	0	0	0	0	0
Tadorna tadorna	Omnivore dabbling ducks	6	810	0	0	0	0	0	0	0	0	0	0	0	0	0	0	0	0	0	0	0	0	0	0	0	0	0	0	0	0	0	0	0	0	0	0	1	0	0	0	0	0	0	0	0	0	0	0
Oxyura leucocephala	Omnivore diving ducks	2	17	0	0	0	0	0	0	0	0	0	0	0	0	0	0	0	0	0	0	0	0	0	0	0	0	0	0	0	0	0	0	0	0	0	0	0	0	0	0	0	0	0	0	0	0	0	0
[truncated: 377 more columns]
