# Supplementary material for: Functional Traits Drive Dispersal Interactions Between European Waterfowl and Seeds
Source: Front Plant Sci. 2022 Jan 31;12:795288. doi: 10.3389/fpls.2021.795288 (PMC8843038; doi:10.3389/fpls.2021.795288)
Supplement: Supplementary file 4 [file Data_Sheet_4.xlsx]

## Sheet: Sup.Mat_4_OK
	EIV N	EIV F	EIV S	EIV T	EIV L	Roundness	Seed_size (mm3)	seed_mass (mg)	Seed_density	Life_form	Submerged aq. plant zone (sublittoral)	Floating leaved aq. Plant zone (sublittoral)	Emerged plant (reed) zone (eulittoral)	open wet soils muddy surfaces (eulittoral)
Agrostis canina	2	9	0	5	7	0.41241	0.5104	0.08	0.15674	Terrestrial	0	0	0	0
Agrostis capillaris	4	4	0	5	7	0.466702	0.880352	0.075	0.0851932	Terrestrial	0	0	0	0
Agrostis stolonifera	6	6	1	5	7	0.5	0.06	0.07	1.16667	Terrestrial	0	0	0	0
Agrostis vinealis	2	3	0	6	8	0.454167	1.28	0.0793	0.0619531	Terrestrial	0	0	0	0
Aira praecox	2	3	0	6	8	0.251625	1.8734	0.16	0.0854062	Terrestrial	0	0	0	0
Ajuga reptans	5	7	0	5	5	0.769952	4.3	1.4	0.325581	Terrestrial	0	0	0	0
Alisma plantago-aquatica	7	10	1	5	7	0.393939	0.15	0.37	2.46667	Hydato-Helophyte	0	0	1	0
Allium schoenoprasum	4	7	0	5	7	0.531538	5.52975	0.99	0.179032	Terrestrial	0	0	0	0
Allium scorodoprasum	7	6	0	6	6	0.73705	13.36	1.155	0.0864521	Terrestrial	0	0	0	0
Allium vineale	6	4	1	7	6	0.618516	43.9215	7	0.159375	Terrestrial	0	0	0	0
Alnus glutinosa	6	8	1	5	5	0.426175	3.58	5	1.39665	Tree	0	0	0	0
Alnus incana	5	7	0	4	5	0.393298	2.32	1.4	0.603448	Tree	0	0	0	0
Alopecurus geniculatus	6	8	2	6	8	0.60721	0.58	0.284	0.489655	Hydrophyte	0	0	1	1
Alopecurus myosuroides	6	5	0	6	7	0.40621	2.09	1.99	0.952153	Terrestrial	0	0	0	0
Alopecurus pratensis	7	6	1	5	7	0.417469	0.73	0.9	1.23288	Terrestrial	0	0	0	0
Althaea officinalis	5	7	3	7	7	0.576992	3.76	4.2	1.11702	Terrestrial	0	0	0	0
Amaranthus albus	7	4	1	8	9	0.791667	0.35	0.3	0.857143	Terrestrial	0	0	0	0
Amaranthus deflexus	7	4	1	9	8	0.62149	0.34	0.4	1.17647	Terrestrial	0	0	0	0
Amaranthus hybridus	7	4	1	8	8	0.811478	0.48	0.56	1.16667	Terrestrial	0	0	0	0
Amaranthus retroflexus	7	4	1	7	8	0.721914	0.87	0.5	0.574713	Terrestrial	0	0	0	0
Angelica archangelica	7	9	1	5	7	0.425026	16.352	3.9	0.238503	Hygrophyte	0	0	0	1
Anthoxanthum odoratum	4	6	0	4	7	0.404176	0.64	0.55	0.859375	Terrestrial	0	0	0	0
Anthriscus sylvestris	8	5	0	4	7	0.372127	8.28	3.72	0.449275	Terrestrial	0	0	0	0
Apera spica-venti	5	6	0	6	7	0.398095	0.19	0.1	0.526316	Terrestrial	0	0	0	0
Arabidopsis thaliana	4	4	0	6	7	0.62567	0.2068	0.02	0.0967118	Terrestrial	0	0	0	0
Arabis hirsuta	4	4	0	6	7	0.386116	0.63	0.1	0.15873	Terrestrial	0	0	0	0
Arabis scabra	2	3	0	6	7			0.274		Terrestrial	0	0	0	0
Arenaria serpyllifolia	4	4	0	5	8	0.708198	0.30774	0.07	0.227465	Terrestrial	0	0	0	0
Armeria maritima	5	7	3	5	8	0.621812	2.06	1.24	0.601942	Terrestrial	0	0	0	0
Arrhenatherum elatius	7	5	1	5	7	0.414638	22.7176	2.8	0.123252	Terrestrial	0	0	0	0
Artemisia absinthium	7	4	1	6	8	0.378927	0.5885	0.1	0.169924	Terrestrial	0	0	0	0
Arthrocnemum macrostachyum	7	8	8	9	8			0.163		Terrestrial	0	0	0	0
Atriplex hortensis	8	5	1	6	7	0.603075	2.79	5.6	2.00717	Terrestrial	0	0	0	0
Atriplex littoralis	8	6	7	6	9	0.583394	2.39	1.428	0.59749	Terrestrial	0	0	0	0
Atriplex patula	7	5	1	6	7	0.486701	3.64	1.39	0.381868	Terrestrial	0	0	0	0
Atriplex portulacoides	6	8	6	6	9	0.677419	1.92	2.64	1.375	Terrestrial	0	0	0	0
Atriplex prostrata	7	7	0	6	8	0.390649	5.3	4	0.754717	Terrestrial	0	0	0	0
Avena fatua	7	4	0	6	8	0.421851	49.39	18	0.364446	Terrestrial	0	0	0	0
Avena sativa	7	5	0	5	8	0.545139	66	31.5	0.477273	Terrestrial	0	0	0	0
Avenella flexuosa	3	5	0	5	6	0.364255	3.78378	0.52	0.137429	Terrestrial	0	0	0	0
Avenula pubescens	4	4	0	6	7	0.262866	12.1138	1.62	0.133732	Terrestrial	0	0	0	0
Baldellia ranunculoides	2	10	1	6	8	0.563657	2.57	0.47	0.182879	Hydrophyte	0	1	0	0
Bassia hirsuta	5	8	7	6	9	0.549858	1.64			Terrestrial	0	0	0	0
Beta vulgaris	9	5	5	6	9	0.817878	4.34	16.5	3.80184	Terrestrial	0	0	0	0
Betula pendula	4	5	0	3	7	0.283598	0.32	0.6	1.875	Tree	0	0	0	0
Betula pubescens	4	7	0	5	7	0.224561	0.21	0.72	3.42857	Tree	0	0	0	0
Bidens cernua	9	9	1	6	8	0.18607	5.13	3.33	0.649123	Hygrophyte	0	0	1	1
Bidens frondosa	8	9	1	6	7	0.297196	20.48	4.9	0.239258	Hygrophyte	0	0	1	1
Bidens tripartita	7	8	1	6	8	0.234524	9.1	2.3	0.252747	Hygrophyte	0	0	1	1
Brassica napus	7	5	1	6	7	0.935809	8.14	3.3	0.405405	Terrestrial	0	0	0	0
Bromus sterilis	6	4	0	6	7	0.358255	12.58	9.5	0.755167	Terrestrial	0	0	0	0
Calla palustris	4	10	0	5	6	0.916667	49	1.94	0.0395918	Hydrophyte	0	0	1	0
Callitriche truncata	7	12	0	6	7			0.13304		Hydrophyte	0	1	1	1
Calluna vulgaris	1	6	0	2	8	0.545455	0.05	0.03	0.6	Terrestrial	0	0	0	0
Calystegia sepium	7	8	0	6	7	0.674127	49.16	28.2	0.573637	Hygrophyte	0	0	1	0
Camphorosma annua	1	2	9	8	7	0.509425	2.0801	0.59	0.28364	Terrestrial	0	0	0	0
Capsella bursa-pastoris	7	5	0	5	7	0.521885	0.630336	0.1	0.158646	Terrestrial	0	0	0	0
Cardamine amara	6	9	0	5	5	0.519728	1.17	0.3949	0.337521	Hygrophyte	0	0	0	1
Cardamine hirsuta	6	5	0	6	6	0.479843	0.54	0.12	0.222222	Hygrophyte	0	0	0	1
Carex acuta	5	9	1	5	7	0.490991	1.33	1.33	1	Hygrophyte	0	0	1	0
Carex acutiformis	5	9	1	5	6	0.629375	2.94	1.15	0.391156	Hygrophyte	0	0	1	0
Carex aquatilis	4	10	0	6	8	0.522445	1.1	0.473	0.43	Hygrophyte	0	0	0	0
Carex arenaria	2	3	1	6	8	0.576995	1.01	0.95	0.940594	Terrestrial	0	0	0	0
Carex bohemica	5	8	1	5	8	0.361985	0.21	0.219	1.04286	Hygrophyte	0	0	0	1
Carex canescens	2	9	0	4	7	0.542675	0.74	0.357	0.482432	Terrestrial	0	0	0	0
Carex chordorhiza	3	9	0	4	9	0.564103	2.03	1.63	0.802956	Terrestrial	0	0	0	0
Carex disticha	6	9	2	6	8	0.47995	1.2	0.64	0.533333	Hygrophyte	0	0	0	0
Carex divulsa	6	6	0	6	5	0.413095	5.95	2.51	0.421849	Terrestrial	0	0	0	0
Carex elata	5	10	1	5	7	0.476215	1.76	0.66	0.375	Hygrophyte	0	0	1	0
Carex elongata	6	8	0	5	4	0.464521	0.9	0.59	0.655556	Hygrophyte	0	0	0	0
Carex extensa	4	7	6	6	8	0.682696	2.99	1.1	0.367893	Hygrophyte	0	0	0	0
Carex filiformis	5	7	0	6	7	0.719421	1.79	1.11	0.620112	Terrestrial	0	0	0	0
Carex flacca	4	5	1	5	7	0.667474	2.12	0.9	0.424528	Terrestrial	0	0	0	0
Carex flava	2	9	0	5	8	0.70539	1.95	0.85	0.435897	Hygrophyte	0	0	0	1
Carex fuliginosa	1	7	0	1	9	0.34	3.7	0.26	0.07	Terrestrial	0	0	0	0
Carex globularis	2	7	0	6	4	0.719421	1.79	1.04	0.581006	Hygrophyte	0	0	0	0
Carex hirta	5	7	1	6	7	0.637654	7.88	2.47	0.313452	Terrestrial	0	0	0	0
Carex magellanica	2	9	0	3	8	0.531579	1.33	1.5	1.12782	Hygrophyte	0	0	0	0
Carex muricata	5	5	0	5	5	0.401948	6.3492	1.8272	0.287784	Terrestrial	0	0	0	0
Carex myosuroides	6	8	0	6	5	0.576444	5.0419	0.75	0.148753	Terrestrial	0	0	0	0
Carex nardina	1	5	1	6	7	0.451298	3.19275	0.7692	0.240921	Terrestrial	0	0	0	0
Carex nigra	2	8	1	5	8	0.507036	1.3	0.69	0.530769	Hygrophyte	0	0	0	1
Carex oederi	2	9	3	5	8	0.69146	4.09	1.21	0.295844	Hygrophyte	0	0	0	1
Carex cuprina	6	8	3	6	8	0.470432	1.77	1.22	0.689266	Hygrophyte	0	0	0	1
Carex leporina	4	7	0	4	7	0.295238	3.28	0.63	0.192073	Hygrophyte	0	0	0	1
Carex pallescens	3	5	0	4	7	0.595238	1.98	1.18	0.59596	Terrestrial	0	0	0	0
Carex panicea	4	8	1	5	8	0.696173	5.47	2.31	0.422303	Terrestrial	0	0	0	0
Carex paniculata	4	9	1	5	7	0.622863	2.64	0.73	0.276515	Hygrophyte	0	0	0	1
Carex praecox	4	4	1	6	8	0.313675	2.4166	0.8	0.331044	Hygrophyte	0	0	0	1
Carex pseudocyperus	5	9	0	6	7	0.668189	1.07	0.8	0.747664	Hygrophyte	0	0	1	0
Carex riparia	6	9	1	6	6	0.629603	6.79	2.59	0.381443	Hygrophyte	0	0	1	0
Carex rostrata	3	10	0	4	8	0.725947	1.37	1.1	0.80292	Hygrophyte	0	0	0	0
Carex trinervis	2	9	0	6	7	0.442886	2.07	0.27	0.130435	Hygrophyte	0	0	1	0
Carex vesicaria	5	10	1	4	7	0.68848	5.56	1.8	0.323741	Hygrophyte	0	0	1	0
Carex vulpina	5	9	1	6	8	0.494815	3.6	1.48	0.411111	Hygrophyte	0	0	1	0
Carpinus betulus	6	5	0	6	4	0.481481	168.75	42	0.248889	Tree	0	0	0	0
Celtis occidentalis	4	3	0	8	7			126.4		Tree	0	0	0	0
Centaurium pulchellum	4	7	3	6	9	0.811448	0.1584	0.0163	0.102904	Terrestrial	0	0	0	0
Cerastium fontanum	5	5	0	3	7	0.767815	0.197505	0.13	0.658211	Terrestrial	0	0	0	0
Cerastium semidecandrum	3	3	0	7	9	0.707678	0.234	0.04	0.17094	Terrestrial	0	0	0	0
Ceratophyllum demersum	8	12	1	7	6	0.39967	11.3475	2.74	0.241463	Hydrophyte	1	1	1	0
Ceratophyllum submersum	7	12	2	8	5					Hydrophyte	1	0	0	0
Chelidonium majus	8	5	0	6	6	0.776356	0.97	0.72	0.742268	Terrestrial	0	0	0	0
Chenopodium album	7	5	1	5	7	0.689873	0.99	0.6	0.606061	Terrestrial	0	0	0	0
Chenopodium ficifolium	7	6	1	7	7	0.894737	1.25	0.37	0.296	Terrestrial	0	0	0	0
Chenopodium glaucum	9	6	3	6	8	0.555556	0.07	0.23	3.28571	Terrestrial	0	0	0	0
Chenopodium murale	8	5	2	7	8	0.626667	0.86	0.5	0.581395	Terrestrial	0	0	0	0
Chenopodium polyspermum	8	6	0	6	7	0.607843	0.25	0.3	1.2	Terrestrial	0	0	0	0
Chenopodium rubrum	8	7	2	7	8	0.619048	0.02	0.2	10	Terrestrial	0	0	0	0
Chenopodium vulvaria	9	4	3	7	8	0.701067	0.77	0.47	0.61039	Terrestrial	0	0	0	0
Chrysosplenium alternifolium	7	8	0	5	3	0.689394	0.4884	0.054	0.110565	Hygrophyte	0	0	0	1
Cicuta virosa	5	10	0	6	6	0.800975	5.41	1.42	0.262477	Hydrophyte	0	1	1	0
Cirsium arvense	6	6	1	5	8	0.408314	3.32	1.3	0.391566	Terrestrial	0	0	0	0
Cirsium palustre	4	8	0	5	7	0.386032	4	1.63	0.4075	Hygrophyte	0	0	0	0
Cirsium vulgare	8	5	1	5	8	0.417169	6.64	2.9	0.436747	Terrestrial	0	0	0	0
Cladium mariscus	3	10	2	6	9	0.558819	1.95	2.23	1.14359	Hygrophyte	0	0	1	0
Cochlearia danica	5	6	4	6	9	0.657738	1.155	0.231	0.2	Terrestrial	0	0	0	0
Cochlearia officinalis	5	6	3	6	8	0.599062	1.7703	0.5	0.282438	Terrestrial	0	0	0	0
Comarum palustre	3	9	0	4	8	0.624233	2.06	0.47	0.228155	Hygrophyte	0	0	0	0
Convolvulus arvensis	6	4	1	6	7	0.685362	18	15.11	0.839444	Terrestrial	0	0	0	0
Lepidium coronopus	7	6	2	7	8	0.223377	22.74	2.0275	0.0891601	Terrestrial	0	0	0	0
Crataegus laevigata	5	5	0	6	5	0.679876	83.7	59.4	0.709677	Tree	0	0	0	0
Crataegus monogyna	4	4	0	5	6	0.790889	201.25	97	0.481988	Tree	0	0	0	0
Crypsis aculeata	7	7	9	8	9	0.46656	6.5003	0.3	0.0461517	Terrestrial	0	0	0	0
Cynodon dactylon	5	4	2	7	8	0.501176	1.63737	0.3	0.183221	Terrestrial	0	0	0	0
Cyperus difformis	8	10	0	9	9	0.642286	0.05	0.03	0.6	Hygrophyte	0	0	0	1
Cyperus fuscus	6	9	1	6	9	0.558495	0.6882	0.059	0.0857309	Hygrophyte	0	0	0	1
Cyperus serotinus	5	8	0	7	9			0.06		Hygrophyte	0	0	0	1
Dactylis glomerata	6	5	1	5	7	0.383922	6.8894	0.8	0.11612	Terrestrial	0	0	0	0
Damasonium bourgaei								0.9		Hydato-Helophyte	0	1	1	1
Damasonium polyspermum	4	8	0	7	9			0.7		Hydato-Helophyte	0	1	1	1
Danthonia decumbens	2	5	0	5	8	0.461926	6.73012	1.6		Terrestrial	0	0	0	0
Deschampsia cespitosa	5	7	1	5	6	0.364801	3.7908	0.31	0.0817769	Hygrophyte	0	0	0	1
Digitaria sanguinalis	5	4	1	7	8	0.344577	0.41	0.49	1.19512	Terrestrial	0	0	0	0
Draba verna	3	3	0	6	8	0.521643	0.1598	0.024	0.150188	Terrestrial	0	0	0	0
Echinochloa crus-galli	8	5	1	7	7	0.2685	7	1.5	0.214286	Hygrophyte	0	0	1	1
Elaeagnus angustifolia	5	5	1	6	8	0.77193	371.09	124.6	0.335768	Tree	0	0	0	0
Elatine gussonei								0.1		Hydrophyte	0	0	0	1
Elatine hydropiper	5	10	1	6	8	0.526667	0.02	0.1	5	Hydrophyte	0	1	0	1
Eleocharis acicularis	5	10	0	5	8	0.61312	0.18	0.12	0.666667	Hydrophyte	0	1	0	1
Eleocharis multicaulis	4	10	0	6	8	0.552274	1.4	0.08	0.0571429	Hygrophyte	0	0	1	1
Eleocharis palustris	5	10	1	6	8	0.496996	2.48	0.74	0.298387	Hygrophyte	0	0	1	1
Eleocharis uniglumis	5	9	5	6	8	0.662142	1.99	1.01	0.507538	Hygrophyte	0	0	1	1
Eleusine indica	7	4	0	8	8	0.562016	0.39	0.4	1.02564	Terrestrial	0	0	0	0
Elymus pungens	8	5	5	6	7			3.44		Terrestrial	0	0	0	0
Elymus repens	7	5	2	6	7	0.398728	5.17	3.74	0.723404	Terrestrial	0	0	0	0
Empetrum nigrum	2	6	0	3	7	0.698079	2.19	1.05	0.479452	Shrub	0	0	0	0
Epilobium adenocaulon	7	6	1	5	7			0.06		Hygrophyte	0	0	1	1
Epilobium angustifolium	6	5	0	4	8	0.260057	1.4592	0.13	0.0890899	Hygrophyte	0	0	1	1
Epilobium ciliatum	7	6	1	5	7			0.08		Hygrophyte	0	0	1	1
Epilobium hirsutum	7	8	1	5	7	0.515924	0.13	0.1	0.769231	Hygrophyte	0	0	1	0
Epilobium tetragonum	6	6	1	6	7	0.946759	4.9528	0.1	0.0201906	Hygrophyte	0	0	1	1
Equisetum fluviatile	5	10	1	5	8					Hygrophyte	0	0	1	0
Eupatorium cannabinum	7	7	1	5	7	0.407045	2.9472	0.29	0.0983985	Hygrophyte	0	0	1	1
Falcaria vulgaris	5	3	0	7	7	0.410627	1.79	0.9	0.502793	Terrestrial	0	0	0	0
Fallopia convolvulus	6	5	0	6	7	0.726172	19.39	5.84	0.301186	Terrestrial	0	0	0	0
Festuca arundinacea	6	6	3	6	7	0.480952	4.38	2.4	0.547945	Hygrophyte	0	0	0	0
Festuca rubra	4	5	2	6	7	0.29577	1.91	1.1	0.575916	Terrestrial	0	0	0	0
Ficus carica	5	4	0	7	7			1		Tree	0	0	0	0
Filipendula ulmaria	5	8	1	5	6	0.344745	2.76	0.8	0.289855	Terrestrial	0	0	0	0
Fragaria vesca	5	5	0	5	6	0.723027	0.72	0.3	0.416667	Terrestrial	0	0	0	0
Galeopsis tetrahit	6	5	0	4	6	0.665943	10.09	4.1	0.406343	Terrestrial	0	0	0	0
Galium aparine	8	6	1	6	6	0.800432	19.19	9	0.468994	Terrestrial	0	0	0	0
Galium palustre	5	9	1	5	6	1.00088	7.6	1.14	0.15	Hygrophyte	0	0	1	0
Galium tricornutum	4	4	0	7	7	0.799257	26.82	10.49	0.391126	Terrestrial	0	0	0	0
Geranium dissectum	6	5	0	6	7	0.754386	2.74	2.37	0.864964	Terrestrial	0	0	0	0
Geranium lucidum	7	5	0	7	4	0.855607	7.378	0.68	0.0921659	Terrestrial	0	0	0	0
Geranium robertianum	6	6	0	4	5	0.649123	1.54	1.5	0.974026	Terrestrial	0	0	0	0
Geranium sylvaticum	6	6	0	4	7	0.735673	8.9846	6.1	0.67894	Terrestrial	0	0	0	0
Glaux maritima	5	7	6	6	8	0.222222	0.47	0.36	0.765957	Hygrophyte	0	0	0	1
Glyceria declinata	6	9	0	6	5	0.338939	4.15	1.28	0.308434	Hydrophyte	0	0	1	1
Glyceria fluitans	6	10	1	4	6	0.493939	2.57	1.43	0.55642	Hydrophyte	0	0	1	1
Glyceria maxima	8	10	1	5	7	0.5	0.75	0.95	1.26667	Hygrophyte	0	0	1	1
Glyceria notata	8	10	1	6	7	0.491242	1.35	1.44	1.06667	Hydrophyte	0	0	0	1
Gnaphalium uliginosum	5	7	0	6	8	0.376026	0.01	0.01	1	Hygrophyte	0	0	0	1
Halocnemum strobilaceum						0.5		0.8		Terrestrial	0	0	0	0
Helianthus annuus	7	6	0	0	7	0.591463	276.75	38.8	0.140199	Terrestrial	0	0	0	0
Heteranthera limosa	8	10	0	9	9			0.14		Hydrophyte	0	0	1	0
Heteranthera reniformis	6	10	0	8	8					Hydrophyte	0	0	1	0
Hieracium umbellatum	2	4	0	6	7	0.431938	0.91	0.5	0.549451	Terrestrial	0	0	0	0
Hippuris vulgaris	5	10	1	5	8	0.7222	2.19	0.97	0.442922	Hydrophyte	0	0	1	1
Holcus lanatus	5	6	1	6	7	0.56	1.81	0.3	0.165746	Terrestrial	0	0	0	0
Hordeum distichon	7	4	0	6	8	0.581981	93.65	40.9	0.436733	Terrestrial	0	0	0	0
Hordeum marinum	6	6	4	6	9	0.284003	33.78	5.27	0.156009	Terrestrial	0	0	0	0
Hordeum secalinum	6	6	3	6	8	0.268818	26.44	5.96	0.225416	Terrestrial	0	0	0	0
Hordeum vulgare	7	4	0	6	9			41.8		Terrestrial	0	0	0	0
Hydrocharis morsus-ranae	7	11	0	6	7	0.886364	2.4	0.16	0.0666667	Hydrophyte	0	1	1	1
Hylotelephium telephium	4	4	0	6	7	0.454624	0.58104	0.05	0.0860526	Terrestrial	0	0	0	0
Hypericum perforatum	4	4	1	5	7	0.583042	0.8528	0.2	0.234522	Terrestrial	0	0	0	0
Iris pseudacorus	7	9	1	6	6	0.543073	75.14	43	0.572265	Helophyte	0	0	1	0
Juncus acutiflorus	2	8	0	6	8	0.608696	0.02	0.05	2.5	Hygrophyte	0	0	0	0
Juncus articulatus	3	9	1	5	8	0.576348	0.04	0.02	0.5	Helophyte	0	0	1	0
Juncus bufonius	5	8	1	5	8	0.761696	0.19	0.02	0.105263	Hygrophyte	0	0	1	1
Juncus compressus	5	8	3	5	8	0.641667	0.02	0.01	0.5	Hygrophyte	0	0	0	1
Juncus effusus	4	7	1	5	7	0.602564	0.03	0.02	0.666667	Hygrophyte	0	0	0	1
Juncus filiformis	4	9	0	4	7	0.671451	0.06	0.03	0.5	Hygrophyte	0	0	0	0
Juncus gerardi	6	7	7	6	8	0.559524	0.03	0.04	1.33333	Hygrophyte	0	0	0	0
Juncus inflexus	5	7	2	5	7	0.565359	0.02	0.03	1.5	Hygrophyte	0	0	0	1
Juncus littoralis	3	8		8	11			0.07		Hygrophyte	0	0	0	1
Juniperus communis	3	4	0	4	7	0.935556	65.04	12.5	0.192189	Terrestrial	0	0	0	0
Leersia oryzoides	7	9	1	6	7	0.41873	5.33	1.15	0.21576	Hygrophyte	0	0	0	1
Lemna gibba	8	11	1	6	8	0.641667	0.16	0.5	3.125	Hydrophyte	0	1	1	0
Lemna minor	6	11	1	5	7			0.5		Hydrophyte	0	1	1	0
Limonium vulgare	6	8	8	6	9	0.321839	1.17	1.3	1.11111	Terrestrial	0	0	0	0
Linaria arvensis	5	5	0	7	6	0.489488	0.31392	0.2	0.637105	Terrestrial	0	0	0	0
Linaria vulgaris	6	4	1	6	8	0.433419	1.2	0.2	0.166667	Terrestrial	0	0	0	0
Lolium multiflorum	7	5	1	7	7	0.368265	5.77	2.9	0.5026	Terrestrial	0	0	0	0
Lolium perenne	6	5	1	6	8	0.37812	3.32	2	0.60241	Terrestrial	0	0	0	0
Lotus corniculatus	3	4	1	5	7	0.845344	1.73	1	0.578035	Terrestrial	0	0	0	0
Lotus uliginosus	4	8	0	5	8	0.878556	0.63	1	1.5873	Terrestrial	0	0	0	0
Ludwigia peploides	6	9	0	6	7	0.524306	57.6	1.54	0.0267361	Hydrophyte	0	0	1	0
Luzula spicata	2	5	0	2	8			0.27		Terrestrial	0	0	0	0
Lychnis flos-cuculi	4	8	0	5	7	0.710146	0.28	0.21	0.75	Terrestrial	0	0	0	0
Lycopus europaeus	6	8	1	6	6	0.57892	0.94	0.3	0.319149	Hygrophyte	0	0	1	1
Lysimachia vulgaris	5	9	1	5	6	0.639746	1.28	0.33	0.257812	Hygrophyte	0	0	1	1
Lythrum salicaria	5	9	1	5	7	0.53173	0.16	0.07	0.4375	Hygrophyte	0	0	1	1
Matricaria chamomilla	6	5	1	6	7	0.54386	0.09	0.09	1	Terrestrial	0	0	0	0
Medicago arabica	5	5	0	7	8	0.409698	2.88	3.3	1.14583	Terrestrial	0	0	0	0
Medicago lupulina	4	4	1	5	7	0.621655	2.8	1.6	0.571429	Terrestrial	0	0	0	0
Medicago sativa	5	4	1	6	8	0.62444	3.05	2	0.655738	Terrestrial	0	0	0	0
Melilotus indicus	6	4	2	8	9	0.73	5.59	2.3	0.47	Terrestrial	0	0	0	0
Mentha aquatica	6	8	1	5	7	0.566038	0.18	0.2	1.11111	Hydrophyte	0	0	1	1
Menyanthes trifoliata	3	10	0	4	7	0.68027	6.68	2.4	0.359281	Hydrophyte	0	0	1	0
Myosotis arvensis	6	5	0	6	7	0.525034	0.61	0.5	0.819672	Terrestrial	0	0	0	0
Myosotis scorpioides	6	9	0	6	7	0.721956	1.40805	0.3	0.213061	Hydrophyte	0	0	1	1
Myosotis stricta	2	3	0	6	8	0.513505	1.0492	0.15	0.142966	Terrestrial	0	0	0	0
Myriophyllum spicatum	7	12	1	6	5	0.688889	3.24	1.14	0.351852	Hydrophyte	1	1	1	0
Myriophyllum verticillatum	7	12	0	6	5	0.760684	3.05	1.5	0.491803	Hydrophyte	1	1	1	0
Najas gracillima	4	12	0	6	6	0.472752	0.350018			Hydrophyte	0	1	1	0
Najas indica		12								Hydrophyte	0	1	1	0
Najas marina	6	12	2	7	5	0.361111	12	2.64	0.22	Hydrophyte	0	1	0	0
Najas minor	4	12	2	7	6	0.5	0.5	1	2	Hydrophyte	0	0	1	0
Nasturtium microphyllum	6	10	1	6	7	0.528303	0.33	0.13	0.393939	Hydrophyte	0	0	1	1
Nasturtium officinale	7	10	1	5	7	0.558308	0.28	0.19	0.678571	Hydrophyte	0	0	1	1
Nuphar lutea	6	11	0	6	8	0.729032	38.36	21.58	0.562565	Hydrophyte	0	1	0	0
Nymphaea alba	5	11	0	7	8	0.666667	3.46	1.9	0.549133	Hydrophyte	0	1	0	0
Nymphoides peltata	6	11	0	7	8	0.342893	4.97	0.5	0.100604	Hydrophyte	0	1	0	0
Odontites vernus	5	6	1	6	6	0.58066	0.6	0.2	0.333333	Terrestrial	0	0	0	0
Oenanthe aquatica	6	10	1	6	7	0.389316	4.72	2.25	0.476695	Hydrophyte	0	0	1	0
Oenanthe fistulosa	6	9	1	7	7	0.363503	22.65	2.04	0.0900662	Hydrophyte	0	0	1	0
Oryza sativa	8	10	0	9	9			25.7		Helophyte	0	0	1	0
Panicum miliaceum	6	3	0	7	8	0.817568	4.33	4.5	1.03926	Terrestrial	0	0	0	0
Parapholis strigosa	6	6	5	6	8	0.362779	2.33	0.69	0.296137	Terrestrial	0	0	0	0
Parnassia palustris	3	8	0	4	8	0.412309	0.24	0.03	0.125	Hygrophyte	0	0	0	0
Paspalum distichum	5	8	0	7	7	0.385047	5.93	1.12	0.18887	Hydrophyte	0	0	1	0
Paspalum vaginatum	8	10	0	8	10			0.63		Hydrophyte	0	0	1	0
Persicaria amphibia	7	10	1	5	7	0.573211	5.5	2.52	0.458182	Hydrophyte	0	0	0	1
Persicaria hydropiper	7	8	1	6	7	0.415349	8.42	2.02	0.239905	Hygrophyte	0	0	0	1
Persicaria lapathifolia	7	6	1	6	6	0.481797	5.39	1.49	0.276438	Hygrophyte	0	0	0	1
Persicaria maculosa	7	5	1	6	7	0.552241	7	1.6	0.228571	Hygrophyte	0	0	0	1
Persicaria minor	8	8	0	6	7	0.438544	1.64	0.72	0.439024	Hygrophyte	0	0	0	1
Persicaria mitis	7	8	1	6	7	0.536846	5.14	2.42	0.470817	Hygrophyte	0	0	0	1
Persicaria vivipara	2	6	0	2	8	0.690476	6.09	1.83	0.300493	Hygrophyte	0	0	0	0
Phalaris arundinacea	7	9	1	5	7	0.611111	1.05	0.8	0.761905	Hygrophyte	0	0	0	1
Phleum pratense	6	5	1	5	7	0.713152	1.29	0.4	0.310078	Terrestrial	0	0	0	0
Phragmites australis	6	10	1	5	7	0.419414	1.26	0.1	0.0793651	Helophyte	0	0	1	0
Plantago coronopus	4	6	3	7	8	0.468182	1.65	0.21	0.127273	Terrestrial	0	0	0	0
Plantago lanceolata	4	5	1	5	7	0.43891	2.2	1.3	0.590909	Terrestrial	0	0	0	0
Plantago major	7	5	1	6	7	0.439835	0.5	0.2	0.4	Terrestrial	0	0	0	0
Plantago maritima	4	7	7	6	8	0.524177	1.91	0.57	0.298429	Terrestrial	0	0	0	0
Plantago media	3	4	0	6	7	0.444686	1.1	0.39	0.354545	Terrestrial	0	0	0	0
Poa angustifolia	4	4	1	6	7	0.40985	2.1068	0.22	0.104424	Terrestrial	0	0	0	0
Poa annua	7	5	1	5	7	0.539435	0.64	0.3	0.46875	Terrestrial	0	0	0	0
Poa compressa	3	3	1	6	9	0.478129	1.73617	0.2	0.115196	Terrestrial	0	0	0	0
Poa pratensis	6	5	1	5	6	0.522466	0.55	0.3	0.545455	Terrestrial	0	0	0	0
Poa trivialis	6	6	0	5	6	0.47039	0.4	0.1	0.25	Terrestrial	0	0	0	0
Polygonum aviculare	7	5	1	6	7	0.672727	5.39	1.29	0.239332	Terrestrial	0	0	0	0
Potamogeton acutifolius	6	12	1	6	7	0.555	3.2	3.32	1.0375	Hydrophyte	1	0	0	0
Potamogeton berchtoldii	5	12	0	5	6	0.592848	3.26	1.11	0.340491	Hydrophyte	1	0	0	0
Potamogeton coloratus	5	11	0	6	8	0.528971	0.8802	0.42	0.477164	Hydrophyte	1	1	1	0
Potamogeton crispus	6	12	1	5	6	0.641667	48.08			Hydrophyte	1	0	0	0
Potamogeton filiformis	5	12	0	4	7	0.716667	3	2.77	0.923333	Hydrophyte	1	0	0	0
Potamogeton gramineus	4	12	0	5	8	0.488213	4.16	1.65	0.396635	Hydrophyte	1	1	1	0
Potamogeton lucens	6	12	1	6	6	0.615562	13.71	5.4	0.393873	Hydrophyte	1	0	0	0
Potamogeton natans	5	11	1	5	6	0.5	15.19	5.2	0.34233	Hydrophyte	0	1	1	0
Potamogeton nodosus	5	12	1	6	6	0.464626	8.575	4.44	0.517784	Hydrophyte	0	1	1	0
Potamogeton obtusifolius	5	12	0	6	6	0.5	6	2.9	0.483333	Hydrophyte	1	0	0	0
Potamogeton pectinatus	7	12	1	5	6	0.451988	8.918	6.28	0.704194	Hydrophyte	1	0	0	0
Potamogeton perfoliatus	5	12	0	5	7	0.582743	8.32	3.25	0.390625	Hydrophyte	1	0	0	0
Potamogeton polygonifolius	2	10	0	5	7	0.650461	2.0864	1.22	0.584739	Hydrophyte	1	0	0	0
Potamogeton pusillus	6	12	2	5	6	0.638889	3	1.41	0.47	Hydrophyte	1	0	0	0
Potentilla anserina	6	7	3	6	7	0.745169	2.59	0.8	0.30888	Terrestrial	0	0	0	0
Potentilla palustris	3	9	0	6	8	0.713649	0.93	0.32	0.344086	Hygrophyte	0	0	1	0
Prunella vulgaris	4	5	1	5	7	0.482697	1.33	1	0.75188	Terrestrial	0	0	0	0
Prunus cerasus	5	5	0	6	6	0.804835	316.48	164.4	0.519464	Tree	0	0	0	0
Puccinellia distans	6	7	5	6	9	0.56229	0.37	0.2	0.540541	Terrestrial	0	0	0	0
Puccinellia maritima	6	8	8	6	9	0.449189	0.97	0.3	0.309278	Terrestrial	0	0	0	0
Puccinellia pseudodistans	7	7	4	4	9	0.520598	0.29	0.25	0.862069	Terrestrial	0	0	0	0
Pyrus malus	5	5	0	6	6	0.464978	56.15	29.4	0.523598	Tree	0	0	0	0
Quercus faginea								634		Tree	0	0	0	0
Quercus robur	4	5	0	5	6	0.854541	3686.13	3497	0.948691	Tree	0	0	0	0
Ranunculus acris	4	6	0	5	7	0.445536	3.99	1.7	0.426065	Terrestrial	0	0	0	0
Ranunculus aquatilis	5	11	0	5	7	0.603286	1.09	0.3	0.275229	Hydrophyte	0	0	1	1
Ranunculus baudotii	6	11	4	6	7	0.466248	0.96	0.21	0.21875	Hydrophyte	0	0	1	1
Ranunculus bulbosus	4	4	0	6	8	0.465769	5.56	2.55	0.458633	Terrestrial	0	0	0	0
Ranunculus flammula	3	9	0	5	7	0.596274	1.17	0.48	0.410256	Hydrophyte	0	0	0	1
Ranunculus hederaceus	5	10	0	5	7	0.695238	1.12	0.37	0.330357	Hydrophyte	0	0	0	1
Ranunculus lingua	7	10	0	6	7	0.411716	7.92	2.85	0.359848	Hygrophyte	0	0	0	1
Ranunculus minimus	5	6	1	7	8	0.519022	0.8996	0.092	0.102268	Terrestrial	0	0	0	0
Ranunculus repens	7	7	1	5	6	0.416678	8.19	2.4	0.29304	Terrestrial	0	0	0	0
Ranunculus sardous	7	7	3	6	8	0.401939	4.03	1.51	0.37469	Hygrophyte	0	0	0	1
Ranunculus sceleratus	8	8	1	6	8	0.556644	0.4	0.2	0.5	Hydrophyte	0	0	0	1
Ranunculus trichophyllus	6	12	0	5	7	0.609524	0.91	0.3	0.32967	Hydrophyte	0	0	1	1
Reseda lutea	5	4	0	6	8	0.631226	1.51	0.8	0.529801	Terrestrial	0	0	0	0
Reseda luteola	6	4	0	7	8	0.711219	0.54	0.3	0.555556	Terrestrial	0	0	0	0
Rhinanthus minor	4	5	0	5	7	0.308074	7.24	2.56	0.353591	Terrestrial	0	0	0	0
Rorippa amphibia	8	10	0	6	7	0.6	0.34	0.09	0.264706	Hydrophyte	0	0	1	1
Rosa canina	5	4	0	5	7	0.690476	0.79	20.1	25.443	Terrestrial	0	0	0	0
Rosa multiflora	5	3	0	7	8	0.580349	13.43	8.4	0.625465	Terrestrial	0	0	0	0
Rubus arcticus	4	5	0	5	7			2		Terrestrial	0	0	0	0
Rubus chamaemorus	1	8	0	3	9	0.67	15.64	7.4	0.47	Terrestrial	0	0	0	0
Rubus fruticosus	6	6	0	5	6	0.643834	8.85	2.23	0.251977	Terrestrial	0	0	0	0
Rubus idaeus	6	5	0	5	6	0.557002	4.21	1.7	0.403894	Terrestrial	0	0	0	0
Rumex acetosa	5	5	1	5	7	1.04487	2.52	0.8	0.31746	Terrestrial	0	0	0	0
Rumex acetosella	3	4	0	5	8	0.81819	0.98	0.7	0.714286	Terrestrial	0	0	0	0
Rumex conglomeratus	7	8	1	6	7	0.748511	1.58	1.3	0.822785	Terrestrial	0	0	0	0
Rumex crispus	6	6	1	5	7	0.751042	3.75	1.5	0.4	Terrestrial	0	0	0	0
Rumex hydrolapathum	6	10	0	6	7	0.694207	12.67	2.8	0.220994	Helophyte	0	0	1	0
Rumex maritimus	7	9	2	7	8	0.626667	0.56	0.45	0.803571	Terrestrial	0	0	0	0
Rumex obtusifolius	9	6	1	5	7	0.691027	4.07	1.5	0.36855	Terrestrial	0	0	0	0
Rumex palustris	8	8	1	7	8	0.693694	1.85	0.8	0.432432	Hygrophyte	0	0	1	1
Rumex pulcher	7	6	0	7	7	0.500498	6.08	2.2	0.361842	Terrestrial	0	0	0	0
Ruppia cirrhosa	5	12	7	6	7	0.638889	9	1.25	0.138889	Hydrophyte	1	0	0	0
Ruppia maritima	8	11	7	6	9	0.638889	3	1.22	0.406667	Hydrophyte	1	0	0	0
Sagina procumbens	6	6	1	5	7	0.611255	0.172	0.02	0.116279	Terrestrial	0	0	0	0
Sagittaria sagittifolia	6	11	0	6	7	0.476154	2.6	1.7	0.653846	Hydato-Helophyte	1	1	1	0
Salicornia europaea	6	8	9	6	9	0.515584	0.46	0.42	0.913043	Terrestrial	0	0	0	0
Salsola soda	8	5	8	7	9	0.895688	7.23486	2	0.276439	Terrestrial	0	0	0	0
Salvinia natans	7	11	0	8	7					Hydrophyte	0	1	0	0
Sambucus nigra	7	5	0	5	6	0.447024	7.7	10	1.2987	Tree	0	0	0	0
Sambucus racemosa	7	5	0	4	6	0.48538	3.46	2.3	0.66474	Tree	0	0	0	0
Sarcocornia fruticosa	7	8	8	9	9	0.720784	1.377	0.2	0.145243	Hygrophyte	0	0	0	0
Saxifraga granulata	4	4	0	6	7	0.621682	0.1456	0.03	0.206044	Terrestrial	0	0	0	0
Schoenus nigricans	2	8	1	6	9	0.777778	1.5	0.65	0.433333	Helophyte	0	0	1	0
Scirpus lacustris	6	11	1	6	8	0.532319	5.54	1.62	0.292419	Hydrophyte	0	0	1	0
Scirpus litoralis	6	9	2	7	8	0.566667	2.45	1.201	0.490204	Hydrophyte	0	0	1	0
Scirpus maritimus	7	10	4	6	8	0.500642	6.7	2.4	0.358209	Hydrophyte	0	0	1	0
Scirpus mucronatus	7	9	2	7	8	0.566667	5	0.12	0.024	Hydrophyte	0	0	1	0
Scirpus setaceus	3	9	0	5	7	0.638258	0.18	0.05	0.277778	Helophyte	0	0	1	0
Scirpus sylvaticus	6	8	0	5	6	0.576695	0.35	0.12	0.342857	Helophyte	0	0	1	0
Scirpus tabernaemontani	6	10	5	7	8			1.17		Hygrophyte	0	0	1	1
Scorzoneroides autumnalis	6	5	1	5	7	0.393808	13.1335	0.7	0.0532988	Terrestrial	0	0	0	0
Scrophularia auriculata	7	8	0	7	7	0.6633	0.1	0.12	1.2	Hygrophyte	0	0	0	1
Scrophularia nodosa	6	6	0	5	4	0.702244	0.17	0.14	0.823529	Hygrophyte	0	0	0	1
Secale cereale	7	5	0	6	8	0.502732	79475	16.1	0.000202579	Terrestrial	0	0	0	0
Sedum acre	2	2	0	6	8	0.574743	0.409889	0.04	0.0975874	Terrestrial	0	0	0	0
Senecio aquaticus	5	8	0	6	7	0.52839	0.77	0.37	0.480519	Terrestrial	0	0	0	0
Senecio sylvaticus	7	5	0	5	7	0.360462	3.0296	0.25	0.0825191	Terrestrial	0	0	0	0
Senecio viscosus	4	3	0	6	8	0.371628	5.6544	0.58	0.102575	Terrestrial	0	0	0	0
Senecio vulgaris	7	5	1	5	7	0.356103	1.5872	0.21	0.132308	Terrestrial	0	0	0	0
Setaria italica	8	4	1	8	8	0.610101	1.91	2.3	1.20419	Terrestrial	0	0	0	0
Setaria pumila	6	4	1	7	7	0.583444	6.01	0.87	0.144759	Terrestrial	0	0	0	0
Setaria verticillata	7	4	1	7	8	0.520833	1.52	0.7	0.460526	Terrestrial	0	0	0	0
Setaria viridis	6	4	1	6	7	0.526275	1.06	1	0.943396	Terrestrial	0	0	0	0
Silene viscosa	3	3	0	6	8	0.768192	1.08	0.59	0.546296	Terrestrial	0	0	0	0
Silybum marianum	6	4	1	7	7	0.462393	37.05	24.2	0.653171	Terrestrial	0	0	0	0
Solanum dulcamara	8	9	1	5	6	0.48253	2.68	26	9.70149	Hygrophyte	0	0	0	1
Solanum lycopersicum	7	6	1	6	7			3		Terrestrial	0	0	0	0
Solanum nigrum	8	5	1	6	7	0.449918	1.27	0.8	0.629921	Terrestrial	0	0	0	0
Solidago virgaurea	4	5	0	5	6	0.477314	13.9784	0.57	0.0407772	Terrestrial	0	0	0	0
Sorbus aucuparia	4	6	0	5	6	0.301587	2.63	6	2.28137	Tree	0	0	0	0
Sorghum bicolor	7	5	0	7	9	0.308441	6.09	13.2	2.16749	Terrestrial	0	0	0	0
Sparganium angustifolium	2	11	0	4	7	0.865815	19.56	2.71	0.138548	Hydrophyte	0	0	1	0
Sparganium emersum	6	11	1	6	7	0.811111	13.87	3.15	0.227109	Hydrophyte	0	0	1	0
Sparganium erectum	7	10	1	6	7	0.596775	26.26	19.51	0.742955	Hydrophyte	0	0	1	0
Sparganium minimum	3	11	0	5	7	0.569837	8.46717	2.6	0.307068	Hydrophyte	0	0	1	0
Spartina townsendii	8	10	9	5	8			10.99		Helophyte	0	0	1	0
Spergula arvensis	5	4	0	5	6	0.855072	1.19	0.4	0.336134	Terrestrial	0	0	0	0
Spergularia marina	6	8	8	6	8	0.483926	0.25	0.05	0.2	Terrestrial	0	0	0	0
Spergularia media	5	8	8	6	8	0.453679	0.44	0.1	0.227273	Terrestrial	0	0	0	0
Spergularia rubra	4	5	1	5	8	0.528985	0.470133	0.056	0.119115	Terrestrial	0	0	0	0
Stachys palustris	7	8	1	5	7	0.602984	4.4	1.19	0.270455	Hygrophyte	0	0	1	1
Stachys sylvatica	7	7	0	5	4	0.675025	3.97714	1.4	0.352012	Terrestrial	0	0	0	0
Stellaria alsine	4	8	0	5	5	0.640303	1.166	0.06	0.051458	Hygrophyte	0	0	1	1
Stellaria holostea	6	5	0	6	5	0.619048	3.15	2.88	0.914286	Terrestrial	0	0	0	0
Stellaria media	7	5	1	5	6	0.668974	0.52	0.4	0.769231	Terrestrial	0	0	0	0
Suaeda fruticosa	5	7	5	6	9	0.705554	1.25339	0.22	0.175524	Terrestrial	0	0	0	0
Suaeda maritima	6	8	8	6	9	0.6	1.35	0.83	0.614815	Terrestrial	0	0	0	0
Tamarix africana	3	7	2	9	8			0.1228		Terrestrial	0	0	0	0
Tanacetum vulgare	6	5	1	6	7	0.854167	4	0.2	0.05	Terrestrial	0	0	0	0
Taraxacum palustre	3	8	1	5	7	0.280088	1.75	0.69	0.394286	Terrestrial	0	0	0	0
Teesdalia nudicaulis	2	3	0	6	8	0.558328	0.836025	0.293	0.350468	Terrestrial	0	0	0	0
Thlaspi arvense	7	5	0	5	7	0.565835	3.10901	1	0.321646	Terrestrial	0	0	0	0
Torilis japonica	7	5	1	6	6	0.543388	12.2	1.7	0.139344	Terrestrial	0	0	0	0
Trifolium campestre	4	4	1	6	8	0.657971	0.52	0.3	0.576923	Terrestrial	0	0	0	0
Trifolium dubium	5	5	1	6	6	0.694686	0.56	0.4	0.714286	Terrestrial	0	0	0	0
Trifolium fragiferum	6	7	5	6	8	0.75	1.51	1.1	0.728477	Terrestrial	0	0	0	0
Trifolium pratense	5	5	1	5	7	0.677279	2.05	1.3	0.634146	Terrestrial	0	0	0	0
Trifolium repens	6	5	1	5	7	0.68075	0.69	0.7	1.01449	Terrestrial	0	0	0	0
Trifolium squamosum	6	6	3	7	9			1.2		Terrestrial	0	0	0	0
Trifolium striatum	3	3	1	7	8	0.614105	6.30259	1.7	0.26973	Terrestrial	0	0	0	0
Triglochin maritima	5	8	8	6	8	0.482003	3.84	0.71	0.184896	Hygrophyte	0	0	0	0
Tripleurospermum inodorum	7	5	1	6	7			0.3742		Terrestrial	0	0	0	0
Tripleurospermum maritimum	6	5	1	6	8	0.592473	3.3096	0.42	0.126904	Terrestrial	0	0	0	0
Tripolium pannonicum	6	6	8	7	7	0.300283	1.92	0.62	0.322917	Hygrophyte	0	0	0	0
Triticum aestivum	7	5	0	6	8	0.543563	53.16	40.14	0.755079	Terrestrial	0	0	0	0
Turritis glabra	5	3	0	6	6	0.479734	0.4698	0.051	0.108557	Terrestrial	0	0	0	0
Typha latifolia	7	10	1	6	8	0.442424	0.19	0.1	0.526316	Helophyte	0	0	1	0
Urtica dioica	8	6	0	5	5	0.475702	0.36	0.2	0.555556	Hygrophyte	0	0	0	1
Vaccinium myrtillus	2	6	0	5	5	0.546982	0.48	0.3	0.625	Shrub	0	0	0	0
Vaccinium uliginosum	2	8	0	4	6	0.641905	0.2	0.3	1.5	Shrub	0	0	0	0
Vaccinium vitis-idaea	2	5	0	4	5	0.506667	0.33	0.3	0.909091	Shrub	0	0	0	0
Valeriana excelsa	7	8	0	5	6			1		Hygrophyte	0	0	0	1
Valeriana officinalis	7	7	1	5	7	0.256881	3.38169	1.2	0.354852	Terrestrial	0	0	0	0
Veronica anagallis-aquatica	7	10	2	7	7	0.674242	0.066	0.06	0.909091	Hydrophyte	0	0	1	0
Veronica arvensis	6	5	0	6	7	0.411738	0.456933	0.12	0.26262	Terrestrial	0	0	0	0
Veronica beccabunga	6	10	1	5	6	0.584127	0.07	0.07	1	Hydrophyte	0	0	1	0
Veronica catenata	8	10	2	7	8	0.580757	0.0646	0.04	0.619195	Hydrophyte	0	0	1	0
Veronica hederifolia	6	5	0	6	6	0.734534	7.87	4	0.508259	Terrestrial	0	0	0	0
Veronica longifolia	6	7	0	6	7	0.539801	0.335	0.1	0.298507	Terrestrial	0	0	0	0
Veronica persica	7	5	0	6	7	0.492674	1.15	0.99	0.86087	Terrestrial	0	0	0	0
Veronica polita	7	4	0	6	7	0.558311	1.682	0.376	0.223543	Terrestrial	0	0	0	0
Veronica serpyllifolia	5	5	0	5	6	0.352415	0.252	0.06	0.238095	Terrestrial	0	0	0	0
Viburnum lantana	5	5	0	6	7	0.495238	78.75	39	0.495238	Tree	0	0	0	0
Vicia cracca	5	6	1	5	7	0.913115	30.03	13.9	0.46287	Terrestrial	0	0	0	0
Viola tricolor	5	4	0	5	7	0.680187	2.686	0.9	0.335071	Terrestrial	0	0	0	0
Viscaria vulgaris	3	3	0	6	7	0.565999	0.2832	0.04	0.141243	Terrestrial	0	0	0	0
Vitis vinifera	6	6	0	8	6		53.91	31	0.575032	Terrestrial	0	0	0	0
Zannichellia palustris	7	12	4	6	6	0.6	1.28	1.03	0.804688	Hydrophyte	1	1	1	0
Zea mays	7	3	0	7	9	0.704085	532.83	245.4	0.46056	Terrestrial	0	0	0	0
Zostera angustifolia	5	12	8	5	7					Hydrophyte	1	1	0	0
Zostera marina	6	12	8	6	6	0.483333	15			Hydrophyte	1	1	0	0
Zostera noltii	5	11	8	6	8	0.430556	6			Hydrophyte	1	1	0	0
